# Supplementary material for: AP(R)N, CNS, NP: Pflege- Expertise in der Onkologie
Source: Springer Nature journal article supplement (doi:10.1007/s41906-022-1290-0), 2022-06-01
Supplement: MOESM1 [file 23163032]

## Literatur

### zum Beitrag „AP(R)N, CNS, NP: Pflege- Expertise in der Onkologie“ von Laura Hellmuth

*PflegeZeitschrift* (75) 7/2022, S. 60-63

Anderson, Beverly (2017): An insight into the patient's response to a diagnosis of urological cancer. In: *British Journal of Nursing* 26 (18), S4-S12 (Letzter Zugriff am 11.05.2021).

Bruinooge, Susanna S.; Pickard, Todd A.; Vogel, Wendy; Hanley, Amy; Schenkel, Caroline; Garrett-Mayer, Elisabeth et al. (2018): Understanding the Role of Advanced Practice Providers in Oncology in the United States. In: *Journal of Oncology Practice* (14), e518-e532, (Letzter Zugriff am 14.07.2021).

Blakely, Kala; Cope, Diane G. (2015): Establishing an Advanced Practice Nursing Clinic in the Cancer Setting. In: *Seminars in Oncology Nursing* 31 (4), S. 282–289 (Letzter Zugriff am 12.06.2021).

Button, Elise B.; Gavin, Nicole C.; Keogh, Samantha J. (2014): Exploring palliative care provision for recipients of allogeneic hematopoietic stem cell transplantation who relapsed. In: *Oncology nursing forum* 41 (4), S. 370–381. DOI: 10.1188/14.ONF.370-381.

DBfK; ÖGKV; SBK (2013): Advanced Nursing Practice in Deutschland, Österreich und der Schweiz. Eine Positionierung von DBfK, ÖGKV und SBK. Hg. v. Deutscher Berufsverband für Pflegeberufe Bundesverband e.V., Österreichischer Gesundheits- und Krankenpflegeverband und Schweizer Berufsverband der Pflegefachfrauen und Pflegefachmänner

Dulko, Dorothy; Pace, Claire M.; Dittus, Kim L.; Sprague, Brian L.; Pollack, Lori A.; Hawkins, Nikki A.; Geller, Berta M. (2013): Barriers and facilitators to implementing cancer survivorship care plans. In: *Oncology nursing forum* 40 (6), S. 575–580. DOI: 10.1188/13.ONF.575-580.

Dunphy, Lynne M.; Flinter, Maragaret M.; Simmonds, Katherine E. (2019): The Primary Care Nurse Practitioner. In: Ann B. Hamric, Charlene M. Hanson, Mary Fran Tracy und Eileen T. O'Grady (Hg.): *Advanced practice nursing. An integrative approach*. 6. Edition. St. Louis, Missouri: Elsevier, S. 374–405.

Droog, Elsa; Armstrong, Claire; MacCurtain, Sarah (2014): Supporting patients during their breast cancer journey. The informational role of clinical nurse specialists. In: *Cancer Nursing* 37 (6), S. 429–435, 289 (Letzter Zugriff am 15.06.2021).

Farling Burns, Kirsten (2017): Bladder cancer: Risk factors, diagnosis and management. In: *The Nurse Practitioner* 42 (3), S. 27–33, 289 (Letzter Zugriff am 13.07.2021).

Gaidys, Uta (2019): Begriff und Bedeutung von ANP/APN in der europäischen Pflege. Schweiz, Österreich, Deutschland und Großbritannien. In: Cornelia Kures und Elisabeth Sittner (Hg.): *Advanced Nursing Practice. Die pflegerische Antwort für eine bessere Gesundheitsversorgung*. Wien: facultas.

Graze, Lynn; Brady-Copertino, Catherine; Varner, Ashley; Stiver, Wendy S. (2014): The development of a nursing assessment and symptom management clinic. In: *Clinical Journal of Oncology Nursing* 18 Suppl, S. 12–16. DOI: 10.1188/14.CJON.S2.12-16.

Hall, Susan; Gray, Nicola; Browne, Susan; Ziebland, Sue; Campbell, Neil C. (2012): A qualitative exploration of the role of primary care in supporting colorectal cancer patients. In:

*Supportive care in cancer: official journal of the Multinational Association of Supportive Care in Cancer* 20 (12), S. 3071–3078. DOI: 10.1007/s00520-012-1434-7.

Hall-Alston, Jane M. (2015): Exercise and the breast cancer survivor: the role of the Nurse practitioner. In: *Clinical Journal of Oncology Nursing* 19 (5), E98-E102. DOI: 10.1188/15.COJN.E98-E102.

Hamric A.B.; Hanson C.M.; Tracy M.F.; O'Grady E.T. (2019): *Advanced Practice Nursing- An integrative approach*, 6. Auflage. Elsevier, St. Louis.

Hamric, Ann B.; Tracy, Mary Fran (2019): A definition of Advanced Practice Nursing. In: Ann B. Hamric, Charlene M. Hanson, Mary Fran Tracy und Eileen T. O'Grady (Hg.): *Advanced practice nursing. An integrative approach*. 6. Edition. St. Louis, Missouri: Elsevier, S. 61–79

Hsueh, Martha; Dorcy, Kathleen (2016): Improving Transitions of Care With an Advanced Practice Nurse: A Pilot Study. In: *Clinical Journal of Oncology Nursing* 20 (3), S. 240–243. DOI: 10.1188/16.CJON.240-243

Johansen, May-Lill; Ervik, Bente (2018): Teamwork in primary palliative care: general practitioners' and specialised oncology nurses' complementary competencies. In: *BMC health services research* 18 (1), S. 159. DOI: 10.1186/s12913-018-2955-7.

Kazanowski, Mary; Sheldon, Lisa Kennedy (2014): Working together. In: *Clinical Journal of Oncology Nursing* 18 Suppl, S. 45–48. DOI: 10.1188/14.CJON.S1.45-48.

Keinath, Elke (2019): Start it up! Implementation von ANP im akutstationären Setting. In: Cornelia Kures und Elisabeth Sittner (Hg.): *Advanced Nursing Practice. Die pflegerische Antwort für eine bessere Gesundheitsversorgung*. Wien: facultas, S. 32–46.

Kiely, Deirdre (2014): Timeliness in breast cancer care as an indicator of quality. In: *Clinical Journal of Oncology Nursing* 18 (1), S. 82–88. DOI: 10.1188/14.CJON.82-88.

Kobleder, Andrea; Mayer, Hanna; Senn, Beate (2017): 'Feeling someone is there for you' - experiences of women with vulvar neoplasia with care delivered by an Advanced Practice Nurse. In: *Journal of clinical nursing* 26 (3-4), S. 456–465. DOI: 10.1111/jocn.13434.

Leary, Alison; White, John; Yarnell, Laura (2014): The work left undone. Understanding the challenge of providing holistic lung cancer nursing care in the UK. In: *European Journal of Oncology Nursing: the official journal of European Oncology Nursing Society* 18 (1), S. 23–28. DOI: 10.1016/j.ejon.2013.10.002.

Lindsey, Sarah; Astroth, Kim; Kumar, Pankaj (2016): Improving Awareness, Identification, and Management of Sarcopenic Obesity in Cancer Survivors: An Evidence-Based Toolbox. In: *Clinical Journal of Oncology Nursing* 20 (5), E132-8. DOI: 10.1188/16.CJON.E132-E138.

Lusk, Birgid; Cockerham, Anne Z.; Keeling, Arlene W. (2019): Highlights from the History of Advanced Nursing in the United States. In: Ann B. Hamric, Charlene M. Hanson, Mary Fran Tracy und Eileen T. O'Grady (Hg.): *Advanced practice nursing. An integrative approach*. 6. Edition. St. Louis, Missouri: Elsevier.

Mason, Heidi; DeRubeis, Mary Beth; Foster, Jared C.; Taylor, Jeremy M. G.; Worden, Francis P. (2013): Outcomes evaluation of a weekly nurse practitioner-managed symptom management clinic for patients with head and neck cancer treated with chemoradiotherapy. In: *Oncology nursing forum* 40 (6), S. 581–586. DOI: 10.1188/13.ONF.40-06AP

Mau, Kari (2018): Benign Breast Diseases: An Introduction for the Advanced Practice Nurse. In: *Clinical Journal of Oncology Nursing* 22 (5), S. 493–495. DOI: 10.1188/18.CJON.493-495.

Mayer, Erica L.; Gropper, Adrienne B.; Neville, Bridget A.; Partridge, Ann H.; Cameron, Danielle B.; Winer, Eric P.; Earle, Craig C. (2012): Breast cancer survivors' perceptions of

survivorship care options. In: *Journal of Clinical Oncology: official journal of the American Society of Clinical Oncology* 30 (2), S. 158–163. DOI: 10.1200/JCO.2011.36.9264

Mayer, Deborah K.; Gerstel, Adrian; Walton, Annmarie Lee; Triglianios, Tammy; Sadiq, Teresa E.; Hawkins, Nikki A.; Davies, Janine M. (2014): Implementing survivorship care plans for colon cancer survivors. In: *Oncology nursing forum* 41 (3), S. 266–273. DOI: 10.1188/14.ONF.266-273.

McCorkle, Ruth; Jeon, Sangchoon; Ercolano, Elizabeth; Lazenby, Mark; Reid, Amanda; Davies, Marianne et al. (2015): An Advanced Practice Nurse Coordinated Multidisciplinary Intervention for Patients with Late-Stage Cancer: A Cluster Randomized Trial. In: *Journal of palliative medicine* 18 (11), S. 962–969. DOI: 10.1089/jpm.2015.0113.

McInness, Douglas; Belun-Vieira, Irina; Sheriff, Matin Khalid (2016): In the case of prostate cancer patients, are there advantages in cancer nurse-led follow-up? In: *Int J Urol Nurs* 10 (3), S. 154–166. DOI: 10.1111/ijun.12112.

O'Brien, Michele; Stricker, Carrie Tompkins; Foster, Jacqueline D.; Ness, Kimberly; Arlen, Aimee Ginsburg; Schwartz, Rowena N. (2014): Navigating the seasons of survivorship in community oncology. In: *Clinical Journal of Oncology Nursing* 18 Suppl, S. 9–14. DOI: 10.1188/14.CJON.S1.9-14.

Post, Kathryn E.; Moy, Beverly; Furlani, Catherine; Strand, Elizabeth; Flanagan, Jane; Peppercorn, Jeffrey M. (2017): Survivorship Model of Care: Development and Implementation of a Nurse Practitioner-Led Intervention for Patients With Breast Cancer. In: *Clinical Journal of Oncology Nursing* 21 (4), E99-E105. DOI: 10.1188/17.CJON.E99-E105.

Rettig, Amy (2012): Breast cancer, panic disorder, and CYP2D6: a case study. In: *Clinical Journal of Oncology Nursing* 16 (3), 314-5, 323. DOI: 10.1188/12.CJON.314-315.

Ruegg, Tracy A. (2013): A nurse practitioner-led urgent care center: meeting the needs of the patient with cancer. In: *Clinical Journal of Oncology Nursing* 17 (4), E52-E57, 289 (Letzter Zugriff am 11.05.2021).

Spoelstra, Sandra L.; Burhenn, Peggy S.; DeKoekkoek, Tracy; Schueller, Monica (2016): A Trial Examining an Advanced Practice Nurse Intervention to Promote Medication Adherence and Symptom Management in Adult Cancer Patients Prescribed Oral Anti-Cancer Agents: Study Protocol. In: *Peer Reviewed Articles* 27 (2), 289 (Letzter Zugriff am 11.05.2021).

Spruce, Lisa R.; Tanner Sanford, Julie (2012): An intervention to change the approach to colorectal cancer screening in primary care. In: *Journal of the American Academy of Nurse Practitioners* 24, S. 167–174 289 (Letzter Zugriff am 10.06.2021).

Stahlke, Sarah; Rawson, Krista; Pituskin, Edith (2017): Patient Perspectives on Nurse Practitioner Care in Oncology in Canada. In: *Journal of Nursing Scholarship* 49 (5), S. 487–494 289 (Letzter Zugriff am 15.06.2021).

Tracy, Mary Fran; Sendelbach, Sue (2019): The Clinical Nurse Specialist. In: Ann B. Hamric, Charlene M. Hanson, Mary Fran Tracy und Eileen T. O'Grady (Hg.): *Advanced practice nursing. An integrative approach*. 6. Edition. St. Louis, Missouri: Elsevier, S. 343–373.

Tripp, Kimberly; Day, LaKeisha; Blake, Alexandra; Bertram, Ivy (2017): Delivery of Clinical Services: Mobilizing Advanced Practice Providers to Enhance Patient Care. In: *Clinical Journal of Oncology Nursing* 21 (4), S. 423–427. DOI: 10.1188/17.CJON.423-427

Turner, Bruce; Sacha, Ali; Drudge-Coates, Lawrence; Pati, Jhumur; Nargund, Vinod; Wells, Paula (2016): Skeletal Health Part 2: Development of a nurse practitioner bone support clinic for urologic patients. In: *Urologic Nursing* 36 (1), S. 22–26 289 (Letzter Zugriff am 11.05.2021).

Ulrich, Connie M.; Zhou, Quiping; Ratcliffe, Sarah J.; Ye, Lichuan; Grady, Christine; Watkins-Bruner, Deborah (2012): Nurse Practitioners' attitudes about cancer clinical trials and willingness to recommend research participation. In: *Contemporary clinical trials* 33 (1), S. 76–84. DOI: 10.1016/j.cct.2011.09.005.

Werner, Janne; Dimitriadou-Xanthopoulou, Nikoletta; Knisch-Wesemann, Alexandra; Meißner, Kerstin (2021): Als Advanced Practice Nurse aktiv die Pflegepraxis mitgestalten. In: *Pflege* 34 (6), S. 321–327. DOI: 10.1024/1012-5302/a000840.
